# Supplementary material for: Liquid Biopsy Testing Can Improve Selection of Advanced Non-Small-Cell Lung Cancer Patients to Rechallenge with Gefitinib
Source: PubMed Central journal article supplement (PMC6826724; doi:10.3390/cancers11101431), 2019-09-25
Supplement: cancers-11-01431-s001.pdf [file cancers-11-01431-s001.pdf]

Supplementary Materials: Liquid biopsy testing can improve selection of advanced non-small cell lung cancer patients to rechallenge with gefitinib

**Supplementary table 1: Details on rechallenge with gefitinib for individual patients.**

| <b>Patient ID</b> | <b>Rechallenge Treatment Start Date</b> | <b>Rechallenge Treatment End Date</b> | <b>Reason for interruption</b> |
|-------------------|-----------------------------------------|---------------------------------------|--------------------------------|
| 03-01             | 27/12/2012                              | 08/04/2013                            | Disease Progression            |
| 03-02             | 07/05/2013                              | 31/01/2014                            | Disease Progression            |
| 04-01             | 04/06/2013                              | 06/08/2013                            | Interrupted                    |
| 04-02             | 29/07/2013                              | 23/06/2014                            | Missing                        |
| 04-03             | 23/08/2013                              | 11/10/2013                            | Disease Progression            |
| 04-04             | 15/01/2014                              | 26/02/2014                            | Disease Progression            |
| 05-01             | 19/10/2012                              | 31/01/2013                            | Disease Progression            |
| 05-02             | 06/12/2012                              | 12/12/2012                            | Patient died                   |
| 05-03             | 06/06/2013                              | 01/07/2014                            | Disease Progression            |
| 06-01             | 24/10/2012                              | 14/01/2013                            | Interrupted                    |
| 06-02             | 31/01/2013                              | 24/04/2013                            | Clinical                       |
| 09-02             | 30/01/2013                              | 16/07/2014                            | Disease Progression            |
| 10-01             | 05/11/2012                              | 14/06/2013                            | Disease Progression            |
| 10-02             | 16/01/2013                              | 03/09/2013                            | Badly clinical condition       |
| 10-03             | 20/08/2013                              | 10/01/2014                            | Disease                        |
| 10-04             | 24/10/2013                              | 04/11/2013                            | Patient hospitalized           |
| 11-01             | 23/07/2012                              | 29/10/2012                            | Disease Progression            |
| 11-02             | 29/05/2013                              | 11/11/2013                            | Disease Progression            |
| 11-03             | 12/12/2013                              | 12/06/2014                            | Disease Progression            |
| 12-01             | 07/10/2013                              | 12/05/2014                            | Disease Progression            |
| 15-02             | 26/07/2013                              | 10/04/2014                            | Disease Progression            |
| 18-01             | 20/12/2012                              | 24/04/2013                            | Disease Progression            |
| 18-02             | 10/06/2013                              | 26/05/2014                            | Heart Attack                   |
| 19-01             | 24/07/2013                              | 23/08/2013                            | Missing                        |
| 19-03             | 30/10/2013                              | 20/11/2013                            | Disease Progression            |
| 21-01             | 20/12/2012                              | 12/02/2013                            | Disease Progression            |
| 21-02             | 17/01/2013                              | 18/04/2013                            | Disease Progression            |
| 21-04             | 30/05/2013                              | 31/10/2013                            | Disease Progression            |
| 25-01             | 30/04/2013                              | 16/08/2013                            | Disease Progression            |
